# Supplementary material
Source: ML conference proceedings conference paper supplement (https://proceedings.neurips.cc/paper_files/paper/2023/hash/2f9b3ee2bcea04b327c09d7e3145bd1e-Abstract.html)
Supplement: Supplementary file 1 [file 2f9b3ee2bcea04b327c09d7e3145bd1e-Supplemental-Conference.pdf]

## 7 Appendix: quasi-Monte Carlo graph random features (q-GRFs)

### 7.1 On the approximation of the $d$ -regularised Laplacian using GRFs

In this appendix, we demonstrate how to approximate the  $d$ -regularised Laplacian  $\mathbf{K}_{\text{lap}}^{(d)}$  with GRFs.

Recall that GRFs provide an estimator to the quantity  $(\mathbf{I}_N - \mathbf{U})^{-2}$  where  $\mathbf{U}$  is a weighted adjacency matrix. Recall also that the matrix elements of the symmetrically normalised Laplacian  $\tilde{\mathbf{L}}$  are given by

$$\tilde{\mathbf{L}}_{ij} = \begin{cases} 1 & \text{if } i = j, \\ -\frac{\mathbf{W}_{ij}}{\sqrt{\deg_{\mathbf{W}}(i)\deg_{\mathbf{W}}(j)}} & \text{if } i \sim j. \end{cases} \quad (24)$$

where  $\deg_{\mathbf{W}}(i) = \sum_{j \in \mathcal{V}} \mathbf{W}_{ij}$  is the weighted degree of the node  $i$ . We are typically interested in situations where  $\mathbf{W} = \mathbf{A}$ , an unweighted adjacency matrix. Now note that

$$\mathbf{K}_{\text{lap}}^{(2)} = (\mathbf{I}_N + \sigma^2 \tilde{\mathbf{L}})_{ij}^{-2} = (1 + \sigma^2)^{-2} (\mathbf{I}_N - \mathbf{U})_{ij}^{-2} \quad (25)$$

where we defined the matrix  $\mathbf{U}$  with matrix elements

$$\mathbf{U}_{ij} = \frac{\sigma^2}{1 + \sigma^2} \frac{\mathbf{W}_{ij}}{\sqrt{\deg_{\mathbf{W}}(i)\deg_{\mathbf{W}}(j)}}. \quad (26)$$

This is itself a weighted adjacency matrix, as required. It follows that, by estimating  $(\mathbf{I}_N - \mathbf{U})^{-2}$  with GRFs, we can trivially estimate  $\mathbf{K}_{\text{lap}}^{(2)}$ . This was reported in [Choromanski, 2023].

Supposing that we have constructed a low-rank GRF estimator

$$\mathbf{K}_{\text{lap}}^{(2)} = \mathbb{E} [\mathbf{C}\mathbf{C}^\top] \quad (27)$$

where the matrix  $\mathbf{C} \in \mathbb{R}^{N \times N}$  has rows  $\mathbf{C}_i := \frac{1}{1 + \sigma^2} \phi(i)^\top$ , we note that it is straightforward to construct the 1-regularised Laplacian kernel estimator

$$\mathbf{K}_{\text{lap}}^{(1)} = \mathbb{E} [\mathbf{C}\mathbf{D}^\top] \quad (28)$$

by taking  $\mathbf{D} := (\mathbf{I}_N + \sigma^2 \tilde{\mathbf{L}})^\top \mathbf{C}$ . It is then trivial to obtain the estimator  $\mathbf{K}_{\text{lap}}^{(d)}$  for arbitrary  $d \in \mathbb{N}$ .

### 7.2 Derivation of Eq. 15

In this appendix we derive Eq. 15, which gives the expected length of some walk  $\omega_2$  given that its antithetic partner  $\omega_1$  is of length  $m$ : that is,  $\mathbb{E}(\text{len}(\omega_2) | \text{len}(\omega_1) = m)$ .

As a warm-up, consider the simpler marginal expected lengths. Note that

$$p(\text{len}(\omega) = m) = (1 - p)^m p. \quad (29)$$

It follows that

$$\mathbb{E}(\text{len}(\omega)) = \sum_{m=0}^{\infty} m(1 - p)^m p = \frac{1 - p}{p} \quad (30)$$

where we computed the arithmetic-geometric series. We reported this result in Eq. 14. Meanwhile, the probability of a walk being of length  $i$  given that its antithetic partner is of length  $m$  is

$$p(\text{len}(\omega_2) = i | \text{len}(\omega_1) = m) = \begin{cases} \left(\frac{1-2p}{1-p}\right)^i \frac{p}{1-p} & \text{if } i < m, \\ 0 & \text{if } i = m, \\ \left(\frac{1-2p}{1-p}\right)^m (1-p)^{i-m-1} p & \text{if } i > m. \end{cases} \quad (31)$$

The analogous sum then becomes

$$\mathbb{E}(\text{len}(\omega_2) | \text{len}(\omega_1) = m) = \sum_{i=0}^m \left(\frac{1-2p}{1-p}\right)^i \frac{p}{1-p} i + \sum_{i=m+1}^{\infty} \left(\frac{1-2p}{1-p}\right)^m (1-p)^{i-m-1} p i. \quad (32)$$

After straightforward but tedious algebra, this evaluates to

$$\mathbb{E}(\text{len}(\omega_2) | \text{len}(\omega_1) = m) = \frac{1-2p}{p} + 2 \left( \frac{1-2p}{1-p} \right)^m, \quad (33)$$

as stated in Eq. 15. Note that this is greater than  $\mathbb{E}(\text{len}(\omega))$  when  $m$  is small and smaller than  $\mathbb{E}(\text{len}(\omega))$  when  $m$  is large; the two walk lengths are negatively correlated.

### 7.3 On the superiority of q-GRFs (proof of Theorem 3.2)

Here, we provide a proof of the central result of Theorem 3.2 that the introduction of antithetic termination reduces the variance of estimators of the matrix  $(\mathbf{I}_N - \mathbf{U})^{-2}$ . From App. 7.1, all our results will trivially extend to the 2-regularised Laplacian kernel  $\mathbf{K}_{\text{lap}}^{(2)}$ .

**Notation:** to reduce the burden of summation indices, we have used Dirac's bra-ket notation from quantum mechanics.  $|y\rangle$  can be interpreted as the vector  $\mathbf{y}$  and  $\langle y|$  as  $\mathbf{y}^\top$ .

We will begin by assuming that the graph is  $d$ -regular, that all edges have equal weights denoted  $w$ , and that our sampling strategy involves the random walker choosing one of its neighbours with equal probability at each timestep. We will relax these assumptions in App. 7.4.

We have seen that antithetic termination does not modify the walkers' marginal termination behaviour, so the variance of the estimator  $\phi(i)^\top \phi(j)$  is only affected via the second-order term  $\mathbb{E}[(\phi(i)^\top \phi(j))^2]$ . Writing out the sums,

$$\begin{aligned} (\phi(i)^\top \phi(j))^2 &= \frac{1}{m^4} \sum_{x,y \in \mathcal{V}} \sum_{k_1, l_1, k_2, l_2=1}^m \sum_{\omega_1 \in \Omega_{ix}} \sum_{\omega_2 \in \Omega_{jx}} \sum_{\omega_3 \in \Omega_{iy}} \sum_{\omega_4 \in \Omega_{jy}} \frac{\tilde{w}(\omega_1)}{p(\omega_1)} \frac{\tilde{w}(\omega_2)}{p(\omega_2)} \frac{\tilde{w}(\omega_3)}{p(\omega_3)} \frac{\tilde{w}(\omega_4)}{p(\omega_4)} \\ &\quad \cdot \mathbb{I}(\omega_1 \in \bar{\Omega}(k_1, i)) \mathbb{I}(\omega_2 \in \bar{\Omega}(l_1, j)) \mathbb{I}(\omega_3 \in \bar{\Omega}(k_2, i)) \mathbb{I}(\omega_4 \in \bar{\Omega}(l_2, j)). \end{aligned} \quad (34)$$

To remind the reader: the variables  $x, y$  sum over the nodes of the graph  $\mathcal{V}$ .  $k_1$  and  $l_1$  enumerate all the  $m$  walks sampled out of node  $i$ , whilst  $k_2$  and  $l_2$  enumerate walks from  $j$ . The sum over  $\omega_1 \in \Omega_{ix}$  is over all possible walks between nodes  $i$  and  $x$ .  $\tilde{w}(\omega_1)$  evaluates the product of edge weights traversed by the walk  $\omega_1$ , which is  $w^{\text{len}(\omega_1)}$  in the equal-weights case (with  $\text{len}(\omega_1)$  denoting the number of edges in  $\omega_1$ ).  $p(\omega_1)$  is the marginal probability of the subwalk  $\omega_1$ , which is equal to  $((1-p)/d)^{\text{len}(\omega_1)}$  on a  $d$ -regular graph. Lastly, the indicator function  $\mathbb{I}(\omega_1 \in \bar{\Omega}(k_1, i))$  evaluates to 1 if the  $k_1$ th walk out of node  $i$  (denoted  $\bar{\Omega}(k_1, i)$ ) contains the walk  $\omega_1$  as a subwalk and 0 otherwise.

We immediately note that our scheme only every correlates walks leaving the same node, so walks out of different nodes remain independent. Therefore,

$$\begin{aligned} \mathbb{E}[\mathbb{I}(\omega_1 \in \bar{\Omega}(k_1, i)) \mathbb{I}(\omega_2 \in \bar{\Omega}(l_1, j)) \mathbb{I}(\omega_3 \in \bar{\Omega}(k_2, i)) \mathbb{I}(\omega_4 \in \bar{\Omega}(l_2, j))] \\ = p(\omega_1 \in \bar{\Omega}(k_1, i), \omega_3 \in \bar{\Omega}(k_2, i)) p(\omega_2 \in \bar{\Omega}(l_1, j), \omega_4 \in \bar{\Omega}(l_2, j)). \end{aligned} \quad (35)$$

Consider the term in the sum corresponding to one particular set of walks  $(k_1, l_1, k_2, l_2)$ ,

$$\begin{aligned} \sum_{x,y \in \mathcal{V}} \sum_{\omega_1 \in \Omega_{ix}} \sum_{\omega_2 \in \Omega_{jx}} \sum_{\omega_3 \in \Omega_{iy}} \sum_{\omega_4 \in \Omega_{jy}} \frac{\tilde{w}(\omega_1)}{p(\omega_1)} \frac{\tilde{w}(\omega_2)}{p(\omega_2)} \frac{\tilde{w}(\omega_3)}{p(\omega_3)} \frac{\tilde{w}(\omega_4)}{p(\omega_4)} \\ \cdot p(\omega_1 \in \bar{\Omega}(k_1, i), \omega_3 \in \bar{\Omega}(k_2, i)) p(\omega_2 \in \bar{\Omega}(l_1, j), \omega_4 \in \bar{\Omega}(l_2, j)). \end{aligned} \quad (36)$$

This object will be of central importance and is referred to as the *correlation term*. In the sum over  $k_1, k_2, l_1, l_2$ , there are three possibilities to consider. We stress again that  $k_{1,2}$  refers to a pair of walks out of node  $i$  and  $l_{1,2}$  refers to a pair out of  $j$ .

- **Case 1, same-same,  $k_1 = k_2, l_1 = l_2$ :** the pair of walks out of  $i$  are identical and the pair of walks out of  $j$  are identical. This term will not be modified by antithetic coupling since the marginal walk behaviour is unmodified and walks out of different nodes remain independent.
- **Case 2, different-different,  $k_1 \neq k_2, l_1 \neq l_2$ :** the walks out of both  $i$  and  $j$  differ, and each pair may be antithetic or independent. This term will be modified by the coupling.
- **Case 3, same-different,  $k_1 = k_2, l_1 \neq l_2$ :** the walks out of  $i$  differ – and may exhibit antithetic or independent termination – but the walks out of  $j$  are the same. This term will be modified by the coupling. Note that the  $i$  and  $j$  labels are arbitrary so we have chosen one ordering for concreteness.

565 If we can reason that the contributions from each of these possibilities 1 – 3 either remains the same  
 566 or is reduced by the introduction of antithetic coupling, then from Eq. 34 we can conclude that the  
 567 entire sum and therefore the Laplacian kernel estimator variance is suppressed. For completeness, we  
 568 write out the entire sum from Eq. 34 with the degeneracy factors below:

$$\begin{aligned}
 (\phi(i)^\top \phi(j))^2 = \frac{1}{m^4} \sum_{x,y \in \mathcal{V}} \left\{ \right. & \\
 & m^2 \sum_{\omega_1 \in \Omega_{ix}} \sum_{\omega_2 \in \Omega_{jx}} \sum_{\omega_3 \in \Omega_{iy}} \sum_{\omega_4 \in \Omega_{jy}} \frac{\tilde{\omega}(\omega_1)}{p(\omega_1)} \frac{\tilde{\omega}(\omega_2)}{p(\omega_2)} \frac{\tilde{\omega}(\omega_3)}{p(\omega_3)} \frac{\tilde{\omega}(\omega_4)}{p(\omega_4)} \left. \right\} \text{same-same (1)} \\
 & \cdot \mathbb{I}(\omega_1 \in \bar{\Omega}(k_1, i)) \mathbb{I}(\omega_2 \in \bar{\Omega}(l_1, j)) \mathbb{I}(\omega_3 \in \bar{\Omega}(k_1, i)) \mathbb{I}(\omega_4 \in \bar{\Omega}(l_1, j)) \\
 & + m^2(m-1)^2 \sum_{\omega_1 \in \Omega_{ix}} \sum_{\omega_2 \in \Omega_{jx}} \sum_{\omega_3 \in \Omega_{iy}} \sum_{\omega_4 \in \Omega_{jy}} \frac{\tilde{\omega}(\omega_1)}{p(\omega_1)} \frac{\tilde{\omega}(\omega_2)}{p(\omega_2)} \frac{\tilde{\omega}(\omega_3)}{p(\omega_3)} \frac{\tilde{\omega}(\omega_4)}{p(\omega_4)} \left. \right\} \text{different-different (2)} \\
 & \cdot \mathbb{I}(\omega_1 \in \bar{\Omega}(k_1, i)) \mathbb{I}(\omega_2 \in \bar{\Omega}(l_1, j)) \mathbb{I}(\omega_3 \in \bar{\Omega}(k_2, i)) \mathbb{I}(\omega_4 \in \bar{\Omega}(l_2, j)) \\
 & + m^2(m-1) \sum_{\omega_1 \in \Omega_{ix}} \sum_{\omega_2 \in \Omega_{jx}} \sum_{\omega_3 \in \Omega_{iy}} \sum_{\omega_4 \in \Omega_{jy}} \frac{\tilde{\omega}(\omega_1)}{p(\omega_1)} \frac{\tilde{\omega}(\omega_2)}{p(\omega_2)} \frac{\tilde{\omega}(\omega_3)}{p(\omega_3)} \frac{\tilde{\omega}(\omega_4)}{p(\omega_4)} \left. \right\} \\
 & \cdot \mathbb{I}(\omega_1 \in \bar{\Omega}(k_1, i)) \mathbb{I}(\omega_2 \in \bar{\Omega}(l_1, j)) \mathbb{I}(\omega_3 \in \bar{\Omega}(k_2, i)) \mathbb{I}(\omega_4 \in \bar{\Omega}(l_1, j)) \\
 & + m^2(m-1) \sum_{\omega_1 \in \Omega_{ix}} \sum_{\omega_2 \in \Omega_{jx}} \sum_{\omega_3 \in \Omega_{iy}} \sum_{\omega_4 \in \Omega_{jy}} \frac{\tilde{\omega}(\omega_1)}{p(\omega_1)} \frac{\tilde{\omega}(\omega_2)}{p(\omega_2)} \frac{\tilde{\omega}(\omega_3)}{p(\omega_3)} \frac{\tilde{\omega}(\omega_4)}{p(\omega_4)} \left. \right\} \text{same-different (3)} \\
 & \cdot \mathbb{I}(\omega_1 \in \bar{\Omega}(k_1, i)) \mathbb{I}(\omega_2 \in \bar{\Omega}(l_1, j)) \mathbb{I}(\omega_3 \in \bar{\Omega}(k_1, i)) \mathbb{I}(\omega_4 \in \bar{\Omega}(l_2, j)). \left. \right\}
 \end{aligned} \tag{37}$$

569 We now address each case 1 – 3 in turn.

### 570 7.3.1 Case 1: $k_1 = k_2, l_1 = l_2$

571 Case 1 is trivial. By design, antithetic termination does not affect the marginal walk behaviour (a  
 572 sufficient condition for the estimator to remain unbiased). This means that it cannot affect terms that  
 573 consider a single walk out of node  $i$  and a single walk out of  $j$ , and all terms of case 1 are unchanged  
 574 by the introduction of antithetic termination.

### 575 7.3.2 Case 2: $k_1 \neq k_2, l_1 \neq l_2$

576 Now we consider terms where both the walks out of node  $i$  and the walks out of node  $j$  differ. To  
 577 emphasise, we are considering 4 different random walks: 2 out of  $i$  and 2 out of  $j$ .

578 Within this setting, we will need to consider the situations where either i) one or ii) both of the  
 579 pairs exhibit antithetic termination rather than i.i.d.. Terms of both kind will appear when we use  
 580 ensembles of antithetic pairs. We need to check that in both cases the result is smaller compared to  
 581 when both pairs are i.i.d..

582 To evaluate these terms, we first need to understand how inducing antithetic termination modifies  
 583 the joint distribution  $p(\omega_1 \in \bar{\Omega}(k_1, i), \omega_3 \in \bar{\Omega}(k_2, i))$ : namely, the probability that two randomly  
 584 sampled walks  $\bar{\Omega}(k_1, i)$  and  $\bar{\Omega}(k_2, i)$  contain the respective subwalks  $\omega_1$  and  $\omega_3$ , given that their  
 585 termination is either i.i.d. or antithetic. In the i.i.d. case, it is straightforward to convince oneself that

$$p(\omega_1 \in \bar{\Omega}(1, i), \omega_3 \in \bar{\Omega}(3, i)) = \left( \frac{1-p}{d} \right)^m \left( \frac{1-p}{d} \right)^n, \tag{38}$$

586 where  $m$  and  $n$  denote the lengths of subwalks  $\omega_1$  and  $\omega_3$ , respectively. With antithetic termination,  
 587 from Eq. 13 it follows that the probability of sampling a walk  $\bar{\Omega}_3$  of length  $j$  conditioned on sampling  
 588 an antithetic partner  $\bar{\Omega}_1$  of length  $i$  is

$$p(\text{len}(\bar{\Omega}_3) = j | \text{len}(\bar{\Omega}_1) = i) = \begin{cases} \left( \frac{1-2p}{1-p} \right)^j \frac{p}{1-p} & \text{if } j < i, \\ 0 & \text{if } j = i, \\ \left( \frac{1-2p}{1-p} \right)^i (1-p)^{j-i-1} p & \text{if } j > i. \end{cases} \tag{39}$$

589 Using these probabilities, it is then straightforward but algebraically tedious to derive the joint  
 590 probabilities over subwalks

$$p(\omega_1 \in \bar{\Omega}(1, i), \omega_3 \in \bar{\Omega}(3, i)) = \begin{cases} \frac{1}{d^{m+n}} \left( \frac{1-2p}{1-p} \right)^n (1-p)^m & \text{if } n < m, \\ \frac{1}{d^{2m}} (1-2p)^m & \text{if } n = m, \\ \frac{1}{d^{m+n}} \left( \frac{1-2p}{1-p} \right)^m (1-p)^n & \text{if } n > m, \end{cases} \tag{40}$$

591 where  $m$  is the length of  $\omega_1$ ,  $n$  is the length of  $\omega_3$  and  $i$  is now the index of a particular node.

592 To be explicit, we have integrated over the conditional probabilities of *walks* of particular lengths  
 593  $(i, j)$  to obtain the joint probabilities of sampled walks containing *subwalks* of particular lengths  
 594  $(m, n)$ . Let us consider the case of  $n < m$  as an example. Using Eq. 39,

$$p(\omega_1 \in \bar{\Omega}(1, i), \omega_3 \in \bar{\Omega}(3, i)) = \frac{1}{d^{m+n}} \sum_{i=m}^{\infty} \left[ \sum_{j=n}^{i-1} \left( \frac{1-2p}{1-p} \right)^j \frac{p}{1-p} (1-p)^i p + \right. \\ \left. + \sum_{j=i+1}^{\infty} \left( \frac{1-2p}{1-p} \right)^i (1-p)^{j-i-1} p (1-p)^i p \right], \quad (41)$$

595 where the branching factors of  $d$  appeared because at every timestep the subwalks have  $d$  possible  
 596 edges to choose from. After we have completed the particular subwalks of lengths  $m$  and  $n$  we no  
 597 longer care about *where* the walks go, just their lengths, so we stop accumulating these multiplicative  
 598 factors. Computing the summations in Eq. 41 (which are all straightforward geometric series), we  
 599 quickly arrive at the top line of Eq. 40.

600 Returning to our main discussion, note that in the  $d$ -regular, equal-weights case,

$$\sum_{\omega_1 \in \Omega_{ix}} \sum_{\omega_3 \in \Omega_{iy}} \frac{\tilde{\omega}(\omega_1)}{p(\omega_1)} \frac{\tilde{\omega}(\omega_3)}{p(\omega_3)} p(\omega_1 \in \bar{\Omega}(k_1, i), \omega_3 \in \bar{\Omega}(k_2, i)) \\ = \sum_{\omega_1 \in \Omega_{ix}} \sum_{\omega_3 \in \Omega_{iy}} \left( \frac{wd}{1-p} \right)^{m+n} p(\omega_1 \in \bar{\Omega}(k_1, i), \omega_3 \in \bar{\Omega}(k_2, i)). \quad (42)$$

601 The summand depends only on walk lengths  $m, n$  but not direction, which invites us to decompose  
 602 the sum  $\sum_{\omega_1 \in \Omega_{ix}} (\cdot)$  over paths between nodes  $i$  and  $x$  to a sum over path lengths, weighted by the  
 603 number of paths at each length. Explicitly,

$$\sum_{\omega_1 \in \Omega_{ix}} (\cdot) = \sum_{n=1}^{\infty} (\mathbf{A}^n)_{ix} (\cdot), \quad (43)$$

604 with  $\mathbf{A}$  the (unweighted) adjacency matrix. We have used the fact that  $(\mathbf{A}^n)_{ij}$  counts the number of  
 605 walks of length  $n$  between nodes  $i$  and  $x$ .  $\mathbf{A}$  is symmetric so has a convenient decomposition into  
 606 orthogonal eigenvectors and real eigenvalues:

$$(\mathbf{A}^n)_{ix} = \sum_{k=1}^N \lambda_k^n \langle i|k \rangle \langle k|x \rangle \quad (44)$$

607 where  $|k\rangle$  enumerates the  $N$  eigenvectors of  $\mathbf{A}$  with corresponding eigenvalues  $\lambda_k$ , and  $\langle i|$  and  $\langle x|$   
 608 are unit vectors in the  $i$  and  $x$  coordinate axes, respectively. We remind the reader that we have  
 609 adopted Dirac's bra-ket notation;  $|y\rangle$  denotes the vector  $\mathbf{y}$  and  $\langle y|$  denotes  $\mathbf{y}^\top$ .

610 Inserting Eqs 44 and 43 into Eq. 42 and using the probability distributions in Eq. 38 and 40, our  
 611 all-important variance-determining correlation term from Eq. 36 evaluates to

$$\sum_{x, y \in \mathcal{V}} \sum_{k_1, k_2, k_3, k_4=1}^N B_{k_1, k_3}^{(i)} B_{k_2, k_4}^{(j)} \langle i|k_1 \rangle \langle k_1|x \rangle \langle j|k_2 \rangle \langle k_2|x \rangle \langle i|k_3 \rangle \langle k_3|y \rangle \langle j|k_4 \rangle \langle k_4|y \rangle, \quad (45)$$

612 where the matrix elements  $B_{k_1, k_3}^{(i)}$  and  $B_{k_2, k_4}^{(j)}$ , corresponding to the pairs of walkers out of  $i$  and  $j$   
 613 respectively, are equal to one of the two following expressions:

$$B_{k_1, k_3} = \begin{cases} C_{k_1, k_3} := \frac{w\lambda_{k_1}}{1-w\lambda_{k_1}} \frac{w\lambda_{k_3}}{1-w\lambda_{k_3}} & \text{if i.i.d.} \\ D_{k_1, k_3} := \frac{w\lambda_{k_1}}{1-w\lambda_{k_1}} \frac{w\lambda_{k_3}}{1-w\lambda_{k_3}} \frac{c(1-w^2\lambda_{k_1}\lambda_{k_3})}{1-cw^2\lambda_{k_1}\lambda_{k_3}} & \text{if antithetic.} \end{cases} \quad (46)$$

614 Here,  $c$  is a constant defined by  $c := \frac{1-2p}{(1-p)^2}$  with  $p$  the termination probability. These forms are  
 615 straightforward to compute with good algebraic bookkeeping; we omit details for economy of space.

Eq. 45 can be simplified. Observe that  $\sum_{x \in \mathcal{V}} |x\rangle \langle x| = \mathbf{I}_N$  ('resolution of the identity'), and that since the eigenvectors of  $\mathbf{A}$  are orthogonal  $\langle k_1 | k_2 \rangle = \delta_{k_1, k_2}$ . Applying this, we can write

$$\sum_{k_1, k_3=1}^N B_{k_1, k_3}^{(i)} B_{k_1, k_3}^{(j)} \langle i | k_1 \rangle \langle j | k_1 \rangle \langle i | k_3 \rangle \langle j | k_3 \rangle. \quad (47)$$

Our task is then to determine whether 47 is reduced by conditioning that either one or both of the pairs of walkers are antithetic rather than independent. That is,

$$\sum_{k_1=1}^N \sum_{k_3=1}^N (C_{k_1, k_3} D_{k_1, k_3} - C_{k_1, k_3} C_{k_1, k_3}) \langle i | k_1 \rangle \langle j | k_1 \rangle \langle i | k_3 \rangle \langle j | k_3 \rangle \stackrel{?}{\leq} 0, \quad (48)$$

$$\sum_{k_1=1}^N \sum_{k_3=1}^N (D_{k_1, k_3} D_{k_1, k_3} - C_{k_1, k_3} C_{k_1, k_3}) \langle i | k_1 \rangle \langle j | k_1 \rangle \langle i | k_3 \rangle \langle j | k_3 \rangle \stackrel{?}{\leq} 0. \quad (49)$$

Define a vector  $\mathbf{y} \in \mathbb{R}^N$  with entries  $y_p := \langle i | k_p \rangle \langle j | k_p \rangle$ , such that its  $p$ th element is the product of the  $i$  and  $j$ th coordinates of the  $p$ th eigenvector  $\mathbf{k}_p$ . In this notation, Eqs 48 and 49 can be written

$$\sum_{p=1}^N \sum_{q=1}^N (C_{pq} D_{pq} - C_{pq} C_{pq}) y_p y_q \stackrel{?}{\leq} 0, \quad (50)$$

$$\sum_{p=1}^N \sum_{q=1}^N (D_{pq} D_{pq} - C_{pq} C_{pq}) y_p y_q \stackrel{?}{\leq} 0. \quad (51)$$

For Eqs 50 and 51 to be true for arbitrary graphs, it is sufficient that the matrices  $\mathbf{E}$  and  $\mathbf{F}$  with matrix elements  $E_{pq} := C_{pq} D_{pq} - C_{pq} C_{pq}$  and  $F_{pq} := D_{pq} D_{pq} - C_{pq} C_{pq}$  are *negative definite*. Our next task is to prove that this is the case.

First, consider  $\mathbf{E}$ , where just one of the two pairs of walkers is antithetic. Putting in the explicit forms of  $C_{pq}$  and  $D_{pq}$  from Eq. 46

$$E_{pq} = - \left( \frac{\bar{\lambda}_p \bar{\lambda}_q}{(1 - \bar{\lambda}_p)(1 - \bar{\lambda}_q)} \right)^2 \frac{p^2}{(1 - p)^2} \frac{1}{1 - \frac{1-2p}{(1-p)^2} \bar{\lambda}_p \bar{\lambda}_q} \quad (52)$$

where for notational compactness we took  $\bar{\lambda}_p := w \lambda_p$  (the eigenvalues of the *weighted* adjacency matrix  $\mathbf{U}$ ). Taylor expanding,

$$E_{pq} = - \left( \frac{\bar{\lambda}_p \bar{\lambda}_q}{(1 - \bar{\lambda}_p)(1 - \bar{\lambda}_q)} \right)^2 \frac{p^2}{(1 - p)^2} \sum_{m=0}^{\infty} \left( \frac{1 - 2p}{(1 - p)^2} \bar{\lambda}_p \bar{\lambda}_q \right)^m. \quad (53)$$

Inserting this into Eq. 50, we get

$$\sum_{p=1}^N \sum_{q=1}^N E_{pq} y_p y_q = - \frac{p^2}{(1 - p)^2} \sum_{m=0}^{\infty} \left( \sum_{p=1}^N \frac{\bar{\lambda}_p^2}{(1 - \bar{\lambda}_p)^2} \left( \frac{\sqrt{1 - 2p}}{1 - p} \bar{\lambda}_p \right)^m y_p \right)^2 \leq 0, \quad (54)$$

which implies that  $\mathbf{E}$  is indeed negative definite. Note that we have not made any additional assumptions about the values of  $p$  and  $w$  beyond those already stipulated: namely,  $0 < p \leq \frac{1}{2}$  and  $\bar{\lambda}_{\max} < 1$ .

Next, consider  $\mathbf{F}$ , where both pairs of walkers are antithetic. Again inserting Eqs 46, we find that

$$F_{pq} = \left( \frac{\bar{\lambda}_p \bar{\lambda}_q}{(1 - \bar{\lambda}_p)(1 - \bar{\lambda}_q)} \right)^2 \left[ \left( \frac{c - c \bar{\lambda}_p \bar{\lambda}_q}{1 - c \bar{\lambda}_p \bar{\lambda}_q} \right)^2 - 1 \right] \quad (55)$$

where we remind the reader that  $c = \frac{1-2p}{(1-p)^2}$ . The Taylor expansion in  $\bar{\lambda}_p \bar{\lambda}_q$  is

$$\begin{aligned} F_{pq} &= \left( \frac{\bar{\lambda}_p \bar{\lambda}_q}{(1 - \bar{\lambda}_p)(1 - \bar{\lambda}_q)} \right)^2 \left[ \sum_{i=0}^{\infty} (\bar{\lambda}_p \bar{\lambda}_q)^i (c - 1) c^i (1 + c + i(c - 1)) \right] \\ &= w^4 (\lambda_p \lambda_q)^2 \sum_{i, j, k=0}^{\infty} (\lambda_p \lambda_q)^{i+j+k} w^{2i+j+k} (c - 1) c^i (1 + c + i(c - 1)) (j + 1) (k + 1). \end{aligned} \quad (56)$$

637 In fact,  $\mathbf{F}$  is *not* generically negative definite, but will be at sufficiently small  $p$  or  $w$ . Write  
 638  $\mathbf{F} = w^4(\mathbf{G} + \mathbf{H})$ , with

$$G_{pq} := (\lambda_p \lambda_q)^2 (c^2 - 1), \quad (57)$$

$$H_{pq} := (\lambda_p \lambda_q)^2 \sum_{i,j,k=0 \setminus \{i=j=k=0\}}^{\infty} (\lambda_p \lambda_q)^{i+j+k} w^{2i+j+k} (c-1)c^i (1+c+i(c-1))(j+1)(k+1). \quad (58)$$

640  $\mathbf{G}$  is manifestly negative definite because  $c < 1$  but  $\mathbf{H}$  may not be. Treat  $\mathbf{H}$  as a perturbation to  $\mathbf{G}$ .

641 Recalling that the spectral radius of  $\mathbf{H}$  is defined

$$\rho(\mathbf{H}) := \max_{\|\mathbf{x}\|_2=1} \mathbf{H}\mathbf{x}, \quad (59)$$

642 it is clear that the spectral radius of  $\mathbf{H}$  approaches 0 smoothly as  $w \rightarrow 0$  since all its matrix elements  
 643 vanish. Recall also an important corollary of Weyl's perturbation inequality: any perturbed eigenvalue  
 644 of  $\mathbf{F} + \mathbf{G}$  will be within one spectral radius  $\rho(\mathbf{G})$  of the original eigenvalue of  $\mathbf{F}$ . This means that, by  
 645 reducing  $w$ , we can shrink the spectral radius of  $\mathbf{G}$  until  $\rho(\mathbf{G}) < (\lambda_p \lambda_q)^2 (1 - c^2)$ , at which point  
 646 we are guaranteed that  $\mathbf{F}$  will be negative definite. Hence, at sufficiently small  $w$ , correlation terms  
 647 with both pairs antithetic are suppressed as required.

648 Taylor expanding in  $c \rightarrow 1$  (which corresponds to  $p \rightarrow 0$ ) instead of  $\lambda_p \lambda_q$ , we can make exactly  
 649 analogous arguments to find that  $\mathbf{F}$  is also guaranteed to be negative definite with when  $p$  is sufficiently  
 650 small. Briefly: let  $c = 1 - \delta$  with  $\delta = \left(\frac{p}{1-p}\right)^2$ . Then we have that

$$\begin{aligned} F_{pq} &= \left( \frac{\bar{\lambda}_p \bar{\lambda}_q}{(1 - \bar{\lambda}_p)(1 - \bar{\lambda}_q)} \right)^2 \left( (1 - \delta)^2 \left( \frac{1 - \bar{\lambda}_p \bar{\lambda}_q}{1 - \bar{\lambda}_p \bar{\lambda}_q + \delta \bar{\lambda}_p \bar{\lambda}_q} \right)^2 - 1 \right) \\ &= \left( \frac{\bar{\lambda}_p \bar{\lambda}_q}{(1 - \bar{\lambda}_p)(1 - \bar{\lambda}_q)} \right)^2 \left( \frac{-2\delta}{1 - \bar{\lambda}_p \bar{\lambda}_q} + \mathcal{O}(\delta^2) \right). \end{aligned} \quad (60)$$

651 Taylor expanding  $\frac{1}{1 - \bar{\lambda}_p \bar{\lambda}_q}$ , it is easy to see that the operator defined by the  $\mathcal{O}(\delta)$  term of Eq. [60](#) is  
 652 negative definite. This part will dominate over higher order terms (which are *not* in general negative  
 653 definite) when  $\delta$  is sufficiently small, guaranteeing the effectiveness of our mechanism on these terms.

654 As an aside, we also note that Taylor expanding about  $c = 0$  (which corresponds to  $p \rightarrow \frac{1}{2}$ ) yields

$$F_{pq} = \left( \frac{\bar{\lambda}_p \bar{\lambda}_q}{(1 - \bar{\lambda}_p)(1 - \bar{\lambda}_q)} \right)^2 (-1 + \mathcal{O}(c^2)) \quad (61)$$

655 which is manifestly negative definite at small enough  $c$ . Hence, intriguingly, the  $k_1 \neq k_2$  variance  
 656 contributions are also suppressed in the  $p \rightarrow \frac{1}{2}$  limit.

657 This concludes our study of variance contributions in Eq. [36](#) where  $k_1 \neq k_2, l_1 \neq l_2$ . We have found  
 658 that these correlation terms are indeed suppressed by antithetic termination when  $p$  or  $\rho(\mathbf{U})$  is small  
 659 enough (or when  $p$  is sufficiently close to  $\frac{1}{2}$ ).

### 660 7.3.3 Case 3: $k_1 = k_2, l_1 \neq l_2$

661 We now consider terms where  $k_1 = k_2$  and  $l_1 \neq l_2$ . We are considering a total of 3 walks: just 1 out of  
 662 node  $i$  but a pair (which may be antithetic or i.i.d.) out of node  $j$ . We inspect the term

$$\sum_{\omega_1 \in \Omega_{ix}} \sum_{\omega_3 \in \Omega_{iy}} \left( \frac{wd}{1-p} \right)^{m+n} p(\omega_1 \in \bar{\Omega}(k_1, i), \omega_3 \in \bar{\Omega}(k_1, i)), \quad (62)$$

663 where  $m$  denotes the length of  $\omega_1$  and  $n$  denotes the length of  $\omega_3$ . What is the form of  $p(\omega_1 \in$   
 664  $\bar{\Omega}(k_1, i), \omega_3 \in \bar{\Omega}(k_1, i))$ ? It is the probability that a *single* walk out of node  $i$ ,  $\bar{\Omega}(k_1, i)$ , contains  
 665 walks  $\omega_1$  between nodes  $i$  and  $x$  and  $\omega_3$  between  $i$  and  $y$  as subwalks. Such a walk must pass through  
 666 all three nodes  $i, x$  and  $y$ . After some thought,

$$p(\omega_1, \omega_3 \in \bar{\Omega}(k_1, i)) = \begin{cases} \left(\frac{1-p}{d}\right)^m & \text{if } \omega_1 = \omega_3, \\ \left(\frac{1-p}{d}\right)^m & \text{if } \omega_3 \in \omega_1, \\ \left(\frac{1-p}{d}\right)^n & \text{if } \omega_1 \in \omega_3, \\ 0 & \text{otherwise.} \end{cases} \quad (63)$$

667 Here,  $\omega_1 \in \omega_3$  means  $\omega_1$  is a strict subwalk of  $\omega_3$ , so the sequence of nodes traversed is  $i \rightarrow x \rightarrow y$ .  
 668 Likewise,  $\omega_3 \in \omega_1$  implies a path  $i \rightarrow y \rightarrow x$ . Summing these contributions,

$$\begin{aligned}
 & \sum_{\omega_1 \in \Omega_{ix}} \sum_{\omega_3 \in \Omega_{iy}} \left( \frac{wd}{1-p} \right)^{m+n} p(\omega_1 \in \bar{\Omega}(l_1, i), \omega_3 \in \bar{\Omega}(l_1, i)) \\
 &= \underbrace{\sum_{\omega_1 \in \Omega_{ix}} \left( \frac{wd}{1-p} \right)^{2\text{len}(\omega_1)} p(\omega_1 \in \bar{\Omega}(k_1, i)) \delta_{xy}}_{\omega_1 = \omega_3, i \rightarrow x \rightarrow y} \\
 &+ \underbrace{\sum_{\omega_1 \in \Omega_{ix}} \left( \frac{wd}{1-p} \right)^{2\text{len}(\omega_1)} p(\omega_1 \in \bar{\Omega}(k_1, i)) \sum_{\omega_\delta \in \Omega_{xy}} \left( \frac{wd}{1-p} \right)^{\text{len}(\omega_\delta)} p(\omega_\delta \in \bar{\Omega}(k_1, x))}_{\omega_1 \in \omega_3, i \rightarrow x \rightarrow y} \\
 &+ \underbrace{\sum_{\omega_3 \in \Omega_{iy}} \left( \frac{wd}{1-p} \right)^{2\text{len}(\omega_3)} p(\omega_3 \in \bar{\Omega}(k_1, i)) \sum_{\omega_\delta \in \Omega_{yx}} \left( \frac{wd}{1-p} \right)^{\text{len}(\omega_\delta)} p(\omega_\delta \in \bar{\Omega}(k_1, y))}_{\omega_3 \in \omega_1, i \rightarrow y \rightarrow x}.
 \end{aligned} \tag{64}$$

669 We introduced  $\omega_\delta$  for the sum over paths between nodes  $x$  and  $y$ , and  $p(\omega_\delta \in \bar{\Omega}(k_1, x))$  is the  
 670 probability of some particular subwalk  $x \rightarrow y$ , equal to  $\left(\frac{1-p}{d}\right)^{\text{len}(\omega_\delta)}$  in the  $d$ -regular case.  $\omega_3$  is a  
 671 dummy variable so can be relabelled  $\omega_1$ . The variance-determining correlation term from Eq. [36](#)  
 672 becomes

$$\begin{aligned}
 & \sum_{x, y \in \mathcal{V}} \left[ \sum_{\omega_1 \in \Omega_{ix}} \left( \frac{wd}{1-p} \right)^{2\text{len}(\omega_1)} p(\omega_1 \in \bar{\Omega}(k_1, i)) \delta_{xy} \right. \\
 &+ \sum_{\omega_1 \in \Omega_{ix}} \left( \frac{wd}{1-p} \right)^{2\text{len}(\omega_1)} p(\omega_1 \in \bar{\Omega}(k_1, i)) \sum_{\omega_\delta \in \Omega_{xy}} \left( \frac{wd}{1-p} \right)^{\text{len}(\omega_\delta)} p(\omega_\delta \in \bar{\Omega}(k_1, x)) \\
 &+ \left. \sum_{\omega_1 \in \Omega_{iy}} \left( \frac{wd}{1-p} \right)^{2\text{len}(\omega_1)} p(\omega_1 \in \bar{\Omega}(k_1, i)) \sum_{\omega_\delta \in \Omega_{yx}} \left( \frac{wd}{1-p} \right)^{\text{len}(\omega_\delta)} p(\omega_\delta \in \bar{\Omega}(k_1, y)) \right] \\
 & \cdot \sum_{k_2=1}^N \sum_{k_4=1}^N B_{k_2, k_4}^{(j)} \langle j | k_2 \rangle \langle k_2 | x \rangle \langle j | k_4 \rangle \langle k_4 | y \rangle.
 \end{aligned} \tag{65}$$

673 where  $B_{k_2, k_4}^{(j)}$  depends on whether the coupling of the pair of walkers out of node  $j$  is i.i.d. or  
 674 antithetic, as defined in Eq. [46](#).  $x$  and  $y$  are dummy variables so can also be swapped, and the sum  
 675 over the paths  $\omega_\delta$  is computed via the usual sum over path lengths and eigendecomposition of  $\mathbf{A}$ .  
 676 Using the resolution of the identity and working through the algebra, we obtain the correlation term

$$\begin{aligned}
 & \sum_{x \in \mathcal{V}} \left[ \sum_{\omega_1 \in \Omega_{ix}} \left( \frac{wd}{1-p} \right)^{2\text{len}(\omega_1)} p(\omega_1 \in \bar{\Omega}(k_1, i)) \right] \\
 & \cdot \sum_{k_2, k_4=1}^N \left( \frac{1 - w^2 \lambda_{k_2} \lambda_{k_4}}{(1 - w \lambda_{k_2})(1 - w \lambda_{k_4})} \right) B_{k_2, k_4}^{(j)} \langle x | k_2 \rangle \langle k_2 | j \rangle \langle x | k_4 \rangle \langle k_4 | j \rangle.
 \end{aligned} \tag{66}$$

677 Now observe that the prefactor in square brackets is positive for any node  $x$  since it is the expectation  
 678 of a squared quantity. This means that, for the sum in Eq. [66](#) to be suppressed by antithetic coupling,  
 679 it is sufficient for the summation in its lower line to be reduced. Defining a vector  $\mathbf{y} \in \mathbb{R}^N$  with  
 680 elements  $y_p := \langle x | k_p \rangle \langle k_p | j \rangle$ , it becomes clear that we require that the operator  $\mathbf{J}$  with matrix  
 681 elements

$$J_{pq} := \left( \frac{1 - w^2 \lambda_p \lambda_q}{(1 - w \lambda_p)(1 - w \lambda_q)} \right) (D_{pq} - C_{pq}) \tag{67}$$

682 is negative definite. Using the forms in Eq. [46](#),

$$J_{pq} = - \frac{w^2 \lambda_p \lambda_q}{(1 - w \lambda_p)^2 (1 - w \lambda_q)^2} \frac{\frac{p^2}{(1-p)^2} (1 - w^2 \lambda_p \lambda_q)}{1 - \frac{1-2p}{(1-p)^2} w^2 \lambda_p \lambda_q}. \tag{68}$$

683 Making very similar arguments to in Sec. 7.3.2 (namely, Taylor expanding and appealing to Weyl’s  
 684 perturbation inequality), we can show that, whilst this operator is not generically negative definite, it  
 685 will be at sufficiently small  $p$  or  $w$ .

686 A brief note: Taylor expanding in  $c$ ,

$$J_{pq} = -\frac{w^2 \lambda_p \lambda_q}{(1 - w \lambda_p)^2 (1 - w \lambda_q)^2} (1 - w^2 \lambda_p \lambda_q) + \mathcal{O}(c), \quad (69)$$

687 which is only negative definite when we also simultaneously take  $w \rightarrow 0$ . Interestingly, in contrast to  
 688 case 2, these terms are *not* suppressed by  $p \rightarrow \frac{1}{2}$  on its own; we need to control the spectral radius of  
 689  $\mathbf{U}$ .

690 This concludes the section of the proof addressing terms  $k_1 = k_2$  and  $l_1 \neq l_2$  (case 3). Again, these  
 691 variance contributions are always suppressed by antithetic termination at sufficiently small  $p$  or  $\rho(\mathbf{U})$ .

692 Having now considered all the possible variance contributions enumerated by cases 1 – 3 and shown  
 693 that each is either reduced or unmodified by the imposition of antithetic termination, we can finally  
 694 conclude that our novel mechanism does indeed suppress the 2-regularised Laplacian kernel estimator  
 695 variance for a  $d$ -regular graph of equal weights at sufficiently small  $p$  or  $\rho(\mathbf{U})$ .  $\square$

696 As mentioned in the main body of the manuscript, these conditions tend not to be very restrictive in  
 697 experiments. Intriguingly, small  $\rho(\mathbf{U})$  with  $p = \frac{1}{2}$  actually works very well.

698 Our next task is to generalise these results to broader classes of graphs.

## 699 7.4 Extending the results to arbitrary graphs and sampling strategies (Theorem 3.2 cont.)

700 Throughout Sec. 7.3 we considered the simplest setting of a  $d$ -regular graph where all edges have  
 701 equal weight. We have also taken a basic sampling strategy, with the walker choosing one of its  
 702 current node’s neighbours at random at every timestep. Here we relax these assumptions, showing  
 703 that our results remain true in more general settings.

### 704 7.4.1 Relaxing $d$ -regularity

705 First, we consider graphs whose vertex degrees differ. It is straightforward to see that the terms in case  
 706 2 (Sec. 7.3.2) are unmodified because taking  $d^m \rightarrow \prod_{i=1}^m d_i$  in  $p(\omega_1)$  and  $d^n \rightarrow \prod_{i=1}^n d_i$  in  $p(\omega_3)$   
 707 is exactly compensated by the corresponding change in in joint probability  $p(\omega_1 \in \bar{\Omega}(k_1, i), \omega_3 \in$   
 708  $\bar{\Omega}(k_2, i))$ . Our previous arguments all continue to hold.

709 Case 3 (Sec. 7.3.3) is only a little harder. Now the prefactor in square parentheses in the top line of  
 710 Eq. 66 evaluates to

$$\left[ \sum_{\omega_1 \in \Omega_{ix}} \left( \frac{w}{1-p} \right)^{2\text{len}(\omega_1)} \left( \prod_{i=1}^{\text{len}(\omega_1)} d_i^2 \right) p(\omega_1 \in \bar{\Omega}(k_1, i)) \right] \quad (70)$$

711 which is still positive for any node  $x$ . The lower line of Eq. 66 is unmodified because once again the  
 712 change  $d^m \rightarrow \prod_{i=1}^m d_i$  exactly cancels in the marginal and joint probabilities, so  $\mathbf{J}$  is unchanged and  
 713 our previous conclusions prevail.

### 714 7.4.2 Weighted graphs

715 Now we permit edge weights to differ across the graph. Once again, case 2 (Sec. 7.3.2) is straightfor-  
 716 ward: instead of Eq. 43, we take

$$\sum_{\omega_1 \in \Omega_{ix}} \tilde{\omega}(\omega_1) (\cdot) = \sum_{n=1}^{\infty} (\mathbf{U}^n)_{ix} (\cdot), \quad (71)$$

717 where  $\mathbf{U}$  is the *weighted* adjacency matrix. We incorporate the product of each walk’s edge weights  
 718 into the combinatorial factor, then sum over path lengths as before. In downstream calculations we  
 719 drop all instances of  $w$  and reinterpret  $\lambda$  as the eigenvalues of the  $\mathbf{U}$  instead of  $\mathbf{A}$ , but our arguments  
 720 are otherwise unmodified; these variance contributions will be suppressed if  $\rho(\mathbf{U})$  or  $p$  is sufficiently  
 721 small.

Case 3 (Sec. 7.3.3) is also easy enough; the bracketed prefactor of 66 becomes

$$\left[ \sum_{\omega_1 \in \Omega_{ix}} \left( \frac{1}{1-p} \right)^{2\text{len}(\omega_1)} \left( \prod_{i=1}^{\text{len}(\omega_1)} w_{i \sim i+1}^2 d_i^2 \right) p(\omega_1 \in \bar{\Omega}(k_1, i)) \right] \quad (72)$$

which is again positive. Here,  $w_{i \sim i+1}$  denotes the weight associated with the edge between the  $i$  and  $i+1$ th nodes of the walk. Therefore, it is sufficient that the matrix  $\mathbf{J}$  with matrix elements

$$J_{pq} = - \frac{\lambda_p \lambda_q}{(1 - \lambda_p)^2 (1 - \lambda_q)^2} \frac{\frac{p^2}{(1-p)^2} (1 - \lambda_p \lambda_q)}{1 - \frac{1-2p}{(1-p)^2} \lambda_p \lambda_q} \quad (73)$$

is negative definite, with  $\lambda_p$  now the  $p$ th eigenvalue of the *weighted* adjacency matrix  $\mathbf{U}$ . Following the same arguments as in Sec. 7.3.3 this will be the case at small enough  $p$  or  $\rho(\mathbf{U})$ .

### 7.4.3 Different sampling strategies

Finally, we consider modifying the sampling strategy for random walks on the graph. We have previously assumed that the walker takes successive edges at random (i.e. with probability  $\frac{1}{d_i}$ ), but the transition probability can also be a function of the edge weights. For example, if all the edge weights are positive, we might take

$$p(i \rightarrow j | \bar{s}) = \frac{w_{ij}}{\sum_{k \sim i} w_{ik}} \quad (74)$$

for the probability of transitioning from node  $i$  to  $j$  at a given timestep (with  $w_{ij} := \mathbf{U}_{ij}$ ), given that the walker does not terminate. This strategy increases the probability of taking edges with bigger weights and which therefore contribute more to  $(\mathbf{I}_N - \mathbf{U})^{-2}$  – something that empirically suppresses the variance on the estimator of the 2-regularised Laplacian kernel. Does antithetic termination reduce it further?

Case 2 (Sec. 7.3.2) is again easy; the  $w$ -dependent modifications to  $p(\omega_1)$  and  $p(\omega_3)$  are exactly compensated by adjustments to  $p(\omega_1 \in \bar{\Omega}(k_1, i), \omega_3 \in \bar{\Omega}(k_2, i))$ . To wit, Eq. 40 becomes

$$p(\omega_3 \in \bar{\Omega}(3, i), \omega_1 \in \bar{\Omega}(1, i)) = \begin{cases} \frac{\tilde{\omega}(\omega_1) \tilde{\omega}(\omega_3)}{\gamma(\omega_1) \gamma(\omega_3)} \left( \frac{1-2p}{1-p} \right)^n (1-p)^m & \text{if } n < m \\ \frac{\tilde{\omega}(\omega_1)^2}{\gamma(\omega_1)^2} (1-2p)^m & \text{if } n = m \\ \frac{\tilde{\omega}(\omega_1) \tilde{\omega}(\omega_3)}{\gamma(\omega_1) \gamma(\omega_3)} \left( \frac{1-2p}{1-p} \right)^m (1-p)^n & \text{if } n > m. \end{cases} \quad (75)$$

where we defined a new function of a walk,

$$\gamma(\omega) := \prod_{i \in \omega} \sum_{k \sim i} w_{ik}. \quad (76)$$

$\gamma$  computes the sum of edge weights connected to each node in the walk  $\omega$  (excluding the last), then takes the product of these quantities. It is straightforward to check that, when all the graph weights are equal,  $\frac{\tilde{\omega}(\omega)}{\gamma(\omega)} = \frac{1}{d^m}$  with  $m$  the length of  $\omega$ . Meanwhile,  $p(\omega_1)$  becomes

$$p(\omega_1) = \frac{(1-p)^m \tilde{\omega}(\omega_1)}{\gamma(\omega_1)} \quad (77)$$

such that these modifications cancel out when we evaluate Eq. 36.

Case 3 (Sec. 49) is also straightforward. The prefactor in square brackets is equal to 72 and is again positive for any valid sampling strategy  $p(\omega_1 \in \bar{\Omega}(k_1, i))$  and  $\mathbf{J}$  does not change, so our arguments still hold and these variance contributions are reduced by antithetic coupling.

We note that these arguments will generalise straightforwardly to any weight-dependent sampling strategy and are not particular to the linear case.  $\tilde{\omega}/\gamma$  can be replaced by some more complicated variant that defines a valid probability distribution  $p(\omega_1 \in \bar{\Omega}(k_1, i))$  and antithetic termination will still prove effective.

#### 7.4.4 Summary

In Sec. 7.4, our theoretical results for antithetic termination have proved robust to generalisations such as relaxing  $d$ -regularity and changing the walk sampling strategy. A qualitative explanation for this is as follows: upon making the changes, the ratio of the joint to marginal probabilities

$$\frac{p(\omega_1, \omega_3)}{p(\omega_1)p(\omega_3)} \quad (78)$$

is unmodified. This is because *we know* how we are modifying the probability over walks and construct the estimator to compensate for it. Meanwhile, the correlations between walk *lengths* are insensitive to the walk directions, so in every case they continue to suppress the kernel estimator variance. The only kink is the terms described in Sec. 7.3.3 which require a little more work, but the mathematics conspires that our arguments are again essentially unmodified, though perhaps without such an intuitive explanation.

#### 7.5 Beyond antithetic coupling (proof of Theorem 3.4)

Our final theoretical contribution is to consider random walk behaviour when TRVs are offset by *less* than  $p$ ,  $\Delta < p$ . Unlike antithetic coupling, it permits simultaneous termination. Eqs 13 become

$$\begin{aligned} p(s_1) = p(s_2) = p, \quad p(\bar{s}_1) = p(\bar{s}_2) = 1 - p, \quad p(s_2|s_1) = \frac{p - \Delta}{p}, \\ p(\bar{s}_2|\bar{s}_1) = \frac{\Delta}{p}, \quad p(s_2|\bar{s}_1) = \frac{\Delta}{1 - p}, \quad p(\bar{s}_2|s_1) = \frac{1 - p - \Delta}{1 - p}. \end{aligned} \quad (79)$$

The probability of two antithetic walks  $\bar{\Omega}(1, i)$  and  $\bar{\Omega}(3, i)$  containing subwalks  $\omega_1$  and  $\omega_3$  becomes

$$p(\omega_3 \in \bar{\Omega}(3, i), \omega_1 \in \bar{\Omega}(1, i)) = \begin{cases} \frac{1}{d^{m+n}} \left( \frac{1-p-\Delta}{1-p} \right)^n (1-p)^m & \text{if } n < m \\ \frac{1}{d^{2m}} (1-p-\Delta)^m & \text{if } n = m \\ \frac{1}{d^{m+n}} \left( \frac{1-p-\Delta}{1-p} \right)^m (1-p)^n & \text{if } n > m, \end{cases} \quad (80)$$

which the reader might compare to Eq. 40. In analogy to Eq. 46, this induces the matrix

$$D_{k_1, k_3}^\Delta := \frac{w^2 \lambda_{k_1} \lambda_{k_3} \frac{1-p-\Delta}{(1-p)^2}}{1 - w^2 \lambda_{k_1} \lambda_{k_3} \frac{1-p-\Delta}{(1-p)^2}} \left( \frac{1 - w^2 \lambda_{k_1} \lambda_{k_3}}{(1 - w \lambda_{k_1})(1 - w \lambda_{k_3})} \right). \quad (81)$$

We can immediately observe that this is exactly equal to  $C_{k_1, k_3}$  when  $\Delta = p(1 - p)$ , so for a pair of walkers with this TRV offset the variance will be identical to the i.i.d. result. Replacing  $D$  by  $D^\Delta$  in  $E_{pq}$  and  $F_{pq}$  and  $J_{pq}$  and reasoning about negative definiteness via their respective Taylor expansions (as well as the new possible cross-term  $D_{k_1, k_3} D_{k_1, k_3}^\Delta$ ), it is straightforward conclude that variance is suppressed compared to the i.i.d. case provided  $\Delta > p(1 - p)$  and  $\rho(\mathbf{U})$  or  $p$  is sufficiently small. The  $p \rightarrow 0$  limit demands a slightly more careful treatment: in order to stay in the regime  $p(1 - p) < \Delta < p$  we need to simultaneously take  $\Delta \rightarrow 0$ , e.g. by defining  $\Delta(p) := p(1 - p) + ap^2$  with the constant  $0 < a < 1$ .  $\square$

This result was reported in Theorem 3.4 of the main text.

#### 7.6 What about diagonal terms?

The alert reader might remark that all derivations in Sec. 7.3 have taken  $i \neq j$ , considering estimators of the off-diagonal elements of the matrix  $(\mathbf{I}_N - \mathbf{U})^{-2}$ . In fact, estimators of the diagonal elements  $\phi(i)^\top \phi(i)$  will be biased for both GRFs and q-GRFs if  $\phi(i)$  is constructed using the same ensemble of walkers because each walker is manifestly correlated with, rather than independent of, itself. This is rectified by taking *two* ensembles of walkers out of each node, each of which may exhibit antithetic correlations among itself, then taking the estimator  $\phi_1(i)^\top \phi_2(i)$ . It is straightforward to convince oneself that, in this setup, the estimator is unbiased and q-GRFs will outperform GRFs. In practice, this technicality has essentially no effect on (q-)GRF performance and doubles runtime so we omit further discussion.

785 **7.7 Further experimental details: compute, datasets and uncertainties**

786 The experiments in Secs. 4.1, 4.2 and 4.4 were carried out on an Intel® Core™ i5-7640X CPU @  
787 4.00GHz  $\times$  4. Each required  $\sim$  1 CPU hour. The experiments in Sec. 4.3 were carried out on a 2-core  
788 Xeon 2.2GHz with 13GB RAM and 33GB HDD. The computations for the largest considered graphs  
789 took  $\sim$  1 CPU hour.

790 The real-world graphs and meshes were accessed from the repositories [Ivashkin, 2023] and [Dawson-  
791 Haggerty, 2023], with further information about the datasets available therein. Where we were able  
792 to locate them, the original papers presenting the graphs are: [Zachary, 1977, Lusseau et al., 2003,  
793 Newman, 2006, Bollacker et al., 1998, Leskovec et al., 2007].

794 All our experiments report standard deviations on the means, apart from the clustering task in Sec.  
795 4.3 because running kernelised  $k$ -means on large graphs is expensive.
